1  
2  
3  
4  
5  
6  
7  
8  
9  
10  
11  
12  
13  
14  
15  
16  
17  
18  
19  
20  
21  
22  
23  
24  
25  
26  
27  
28  
29  
30  
31  
32  
33  
34  
35  
36  
37  
38  
39  
40  
41  
42  
43

## **SARS-CoV-2 infection in Ivory Coast: a serosurveillance survey among gold mine workers**

Jean Marie Milleliri<sup>1</sup>, Daouda Coulibaly<sup>2</sup>, Blaise Nyobe<sup>3</sup>, Jean-Loup Rey<sup>1</sup>, Franck Lamontagne<sup>1</sup>, Laurent Hocqueloux<sup>4</sup>, Susanna Giaché<sup>4</sup>, Antoine Valéry<sup>5</sup>, Thierry Prazuck<sup>4\*</sup>

1 : Groupe d'intervention en sante publique et epidemiologie, Marseille, France, 2 : Institut National de sante publique, Abidjan, Cote d'Ivoire ; 3 : Medecis, Urgences, Abidjan, Cote d'Ivoire, 4 : Maladies infectieuses et tropicales, Centre Hospitalier Regional d'Orleans, France ; 5 : Departement d'information medicale, Centre Hospitalier Regional d'Orleans, France

\*: Corresponding author: Thierry Prazuck, Centre Hospitalier Regional d'Orleans, 14 avenue de l'hospital, 45067 Orleans, Cedex 2, France . [thierry.prazuck@chr-orleans.fr](mailto:thierry.prazuck@chr-orleans.fr), phone: 00(33) 238229593

Key words : Sars-Cov2 ; epidemiology, Africa, Ivory Coast; prevalence

Abstract: 189 words; manuscript: 2229 words

2 tables

**Background:** Eight months after the detection of the first COVID-19 case in Africa, 1,262,476 cases have been reported in African countries compared to 72 million worldwide. The real burden of SARS-CoV-2 infection in West Africa is not clearly defined. The aim of the study was to evaluate the seroprevalence of SARS-CoV-2 in half of the 3,380 workers of several mining companies operating in two mines in the Ivory Coast and having its headquarters in the economic capital Abidjan.

**Methods:** From 15th July to 13th October 2020, a voluntary serological test campaign was performed in the 3 sites where the companies operate: two mines, and the headquarters in Abidjan. We performed a COVID-PRESTO rapid test for the detection of IgG and IgM on capillary blood. A multivariate analysis was performed to identify independent sociodemographic characteristics associated with a higher SARS-CoV-2 seroprevalence rate.

**Results:** A total of 1,687 subjects were tested. 91% were male (n= 1,536) and mean age was 37 years old. The overall crude seroprevalence rate was 25.1% (n=422), but differing significantly between different sites, rising from 13.6% (11.2%-16.1%) in mine A to 34.4% (31.1%-37.7%) in mine B and 34.7% (26.2%-43.2%) in Abidjan. Non-resident workers in mines had a significantly lower prevalence rate than those living full-time in mines.

44 Seroprevalence was 26.5% in natives of the Ivory Coast, while people  
45 coming from countries other than Africa were less likely to be SARS-CoV-2  
46 seropositive. Among the 422 positive subjects, 74 reported mild symptoms  
47 in the three previous months and one was hospitalized for a severe COVID-  
48 19 infection.

49 **Conclusion:** The prevalence of SARS-CoV-2 infection among mine workers  
50 in Ivory Coast is high. The low morbidity observed has probably led to an  
51 underestimation of the burden of this infection in West Africa. The high  
52 prevalence reported in subjects living in Abidjan, who have not any close  
53 contact with mine workers, may be indicative of the real seroprevalence in  
54 the Ivory Coast capital.  
55

56

57

58

59

60

61

62

63

64

65

66

67

68

69

70

71

72 CoronaVirus Disease 2019 (COVID-19) represents an unprecedented  
73 international public health challenge responsible for significant morbidity  
74 and mortality. In March 2020, the World Health Organization (WHO)  
75 officially declared the COVID-19 pandemic. As of 17th December 2020, the  
76 Severe Acute Respiratory Syndrome CoronaVirus 2 (SARS-CoV-2) caused  
77 1,637,000 deaths out of more than 72 million cases reported worldwide.  
78 Unfortunately these numbers continue to increase every day<sup>1</sup>.

79 Officially, according to the latest October 21<sup>st</sup> 2020 WHO report , COVID-19  
80 cases in Africa were 1,262,476 and COVID-19 related deaths were 28,601,  
81 with no significant change in incidence over weeks (29,919 new confirmed  
82 cases and 474 new deaths from 46 countries, compared to 30,145 cases and  
83 747 deaths in the previous week)<sup>2</sup>.

84 Considering the daily increase in the number of COVID-19 cases all around  
85 the world, it appears that Africa is controlling the epidemic spread better  
86 than Europe, United States or South America. Catastrophic scenarios about  
87 potentially devastating effect of COVID-19 in Africa have fortunately not yet  
88 occurred. The reasons are multiple and not always clearly established<sup>3</sup>.

89 Some authors argue that this epidemic reached Africa a few weeks after  
90 Europe and African leaders adopted preventive measures thanks to  
91 acquired knowledge of what was happening in Europe, having probably  
92 learned important lessons from previous major outbreaks, like 2014 Ebola

93 virus disease in West Africa. In addition, many parts of Africa are still  
94 isolated and not linked to significant tourism and international business  
95 related traffic. However, according to recent data, SARS-CoV-2 serological  
96 positivity in South Africa appears to be so high that it approaches the herd  
97 immunity threshold (i.e. more than 60%) (Jonny Myers, Maverick Citizen,  
98 Open Edition, 7 oct 2020)<sup>4</sup>. Did SARS-CoV2 infection largely and silently  
99 spread in Africa, or did factors such as environment, younger population,  
100 climate and policies limit the penetration of the virus in most African  
101 countries?

102 Since March 2020, Ivory Coast, Mali and Burkina Faso have faced the SARS-  
103 CoV-2 outbreak almost simultaneously. In this report, we present the  
104 results of a COVID-19 serological testing campaign conducted in Ivory Coast  
105 among employees of a gold mining company using a reliable rapid Point-of-  
106 Care (POC) antibody test.

107

## 108 **Background**

109 Several mining companies operate in West Africa. Occupational Health  
110 department is in charge of mine workers as well as administrative staff.  
111 Mines are mainly located in rural areas of the country, between 200 km and  
112 500 km far from the economic capital of the country (Abidjan) where these  
113 companies' headquarters are located. Three-thousand three hundred and

114 eighty people are currently working in these sites, including the Abidjan  
115 headquarters. Of these 3,380 workers, 1,360 are direct employees and  
116 2,020 are subcontractor's employees of different companies. Direct  
117 employees working in the mines live on site in a rather confined place,  
118 while the subcontractor's employees come back home in their  
119 villages/towns every day. Administrative staff and other workers located in  
120 Abidjan headquarters are mainly exposed to COVID-19 in their daily  
121 activities in contact with the Ivorian urban population of Abidjan. The  
122 objective of this testing campaign was to sensitize and protect employees  
123 and their families, particularly when a recent SARS-CoV-2 infection was  
124 diagnosed.

125

## 126 **Subjects and methods**

127 The serological screening based on voluntary testing was conducted in the  
128 period between July 15<sup>th</sup> and October 13<sup>th</sup>. All employees were informed  
129 about the objectives of the campaign and were invited to participate. No  
130 clinical criteria were required to be tested. Tests were performed at the  
131 different work sites by healthcare personnel according to the  
132 manufacturers' instructions after a two-hours training session. For each  
133 participant, a written informed consent was obtained. Test result was  
134 provided within 15 minutes. A photograph of each cassette was

135 systematically performed to be assessed by an independent operator. A  
136 standardized questionnaire was filled for each subject, including age, sex,  
137 working status and previous symptoms potentially related to a SARS-CoV-2  
138 infection in the previous five months (i.e. fever, dyspnea, cough, flu-like  
139 syndrome, anosmia/ageusia).

140

#### 141 *Point-of-care used test*

142 The COVID-PRESTO® SARS-CoV-2 IgG/IgM antibody test kit is a lateral  
143 flow immune-chromatographic assay targeting antibodies specific to the  
144 SARS-CoV-2 N-protein. It has been manufactured and marketed by AAZ-  
145 LMB and already approved by French authorities. This rapid diagnostic test  
146 (RDT) uses anti-human IgM antibodies (test line IgM), anti-human IgG  
147 antibodies (test line IgG) and rabbit IgG (control line C) immobilized on a  
148 nitrocellulose strip. The Conjugate (recombinant SARS-CoV-2 antigens  
149 labeled with colloidal gold) is also integrated into the strip. When a  
150 specimen is well placed in the sample and the assay buffer is added, the IgM  
151 and IgG antibodies, if present, bind to the SARS-CoV-2 conjugates forming  
152 an antigen-antibodies complex. This complex migrates through a  
153 nitrocellulose membrane by capillary action. When the complex meets the  
154 line of the corresponding immobilized antibodies (anti-human IgM and/or  
155 anti-human IgG), the complex is trapped and form a burgundy-colored band

156 confirming test result. Results must be read within 10 minutes by two  
157 independent operators. When the control line is the only one present, the  
158 sample is negative. If the control line does not appear, the test is invalid and  
159 should be repeated with a new cassette. Performances of this test have  
160 already been assessed in real life, regardless of the manufacturer's  
161 instructions. The sensitivity of COVID-PRESTO® test ranged from 10% for  
162 patients having experienced their first symptoms from 0 to 5 days earlier to  
163 100% in patients whose symptoms occurred more than 15 days earlier<sup>5</sup>.

164

#### 165 *Statistical analysis*

166 Data were collected on an Excel spreadsheet. Data were categorized by  
167 mine site, sex, age and working characteristics (i.e. direct employees vs  
168 subcontractor's employees). Qualitative and quantitative variables  
169 including the proportion of seropositivity were reported in percentage and  
170 a 95% confidence interval. Multivariate logistic regression was used to  
171 determine the relationship between demographics characteristics and  
172 seropositivity to the SARS-CoV-2. A p value of less than 0.05 was regarded  
173 as statistically significant. Only statistically significant variables were  
174 introduced in the multivariate model. Analysis was carried out using R  
175 studio software.

176

177 *Ethical considerations*

178 The GISPE Research and Ethical committee approved the survey on May  
179 15<sup>th</sup> 2020 (N° EC-GISPE014). Potential participants were informed about  
180 the campaign purpose and procedures.

181

182 **Results**

183 Among the 3,380 employees, a total of 1,687 subjects (49.9%) were  
184 included in the study. One thousand five hundreds thirty-five were male  
185 and 151 were female. Mean age was 37 (18-66) years old; 1,566 employees  
186 (92.7%) worked in the mine sites and 121 (7.3%) in Abidjan. Among  
187 mining workers, 845 were direct employees living night and day in the  
188 compound (587 in mine A and 258 in mine B), and 718 were  
189 subcontractor's employees of other companies working in the mine during  
190 the day but coming back to village after work (213 in mine A and 501 in  
191 mine B). One thousand four hundreds fifty-eight workers were native from  
192 Ivory Coast (86.4%), 143 from another African country (8.5%) and the  
193 remaining 87 (5.1%) came from 12 worldwide countries (Details in Table I)  
194 Subjects working in Abidjan were significantly older (63% over 36 years  
195 old) and the proportion of male workers was half compared to mine sites.  
196 Among the 1,687 people included in the study, 422 had a positive  
197 serological test (either IgG and/or IgM). Overall seroprevalence was 25.1%



198 and prevalence rates were similar when stratified by age or gender.  
199 According to the different working sites, the seroprevalence was 34.4%,  
200 34.7%, and 13.6% in mine A, Abidjan headquarters and mine B.  
201 Seroprevalence rate was significantly lower in subcontractors workers than  
202 in those living full time in the mines. Ivory Coast natives had the highest  
203 prevalence rate [26.5% (24.3% - 28.8%)]. Conversely, people coming from  
204 countries outside Africa were less likely to be SARS-CoV-2 seropositive  
205 (Details in Table 2).

206 Among the 422 seropositive subjects, only one had previously been  
207 hospitalized for a suspected COVID-19. Eighteen additional subjects had  
208 mild symptoms and were diagnosed by a positive real-time reverse  
209 transcription polymerase chain reaction (RT-PCR) test. Among the 404  
210 remaining subjects, 74 reported mild nonspecific symptoms that may or  
211 may not be attributable to a SARS-CoV-2 infection, particularly in a tropical  
212 setting, but were not tested at the time of symptoms.

213

## 214 **Discussion**

215 The current epidemiological study conducted on a specific African  
216 population reports a SARS-CoV-2 seroprevalence as high as 35% in gold  
217 mining workers as well as in administrative staff living in Abidjan. This  
218 high seroprevalence rate has been reached before July 2020, and it

219 remained stable after the first pandemic wave, between July and October  
220 2020. This silent outbreak had not previously been detected because most  
221 cases were asymptomatic.

222 From March to December 1<sup>st</sup>, 2020, Ivory Coast reported 21,250 SARS-CoV-  
223 2 infections and 127 COVID-19 related deaths, meaning that only the  
224 0.084% of Ivory Coast's 25 million inhabitants has been infected <sup>2</sup>. Official  
225 available data do not reflect the burden of infection but may reflect the  
226 emerging part of the iceberg. To our knowledge, there are very few  
227 published studies evaluating SARS-CoV-2 seroprevalence in African  
228 countries. In Togo, among 955 participants from five different sectors, the  
229 prevalence rate was 0.9% (95% CI: 0.4%-1.8%)<sup>6</sup>. In a study conducted in  
230 Kenya from April to June 2020 on 3,174 blood donors' samples,  
231 seroprevalence was 5.2% (95%CI: 3.7%-7.1%)<sup>7</sup>. In two small populations  
232 of household contacts and healthcare workers in Nigeria, seroprevalence  
233 rates rise to 25.4% and 45% respectively <sup>8,9</sup>. Among the available pre-print  
234 or published studies, seroprevalence was evaluated using Rapid Diagnostic  
235 Tests (RDTs) in three studies, enzyme-linked immunosorbent assay (ELISA)  
236 in three studies and Clinical Laboratory Improvement Amendments (CLIA)  
237 in one study<sup>6-12</sup>. A recent study aiming to detect the persistence of SARS-  
238 CoV-2 antibodies 3 to 4 months after the onset of symptoms in healthcare  
239 workers at the Strasbourg University hospital reported that ELISA

240 serological test has a 59% sensitivity and Biosynex RDT a 85% sensitivity  
241 compared to the S-flow reference test developed by the French National  
242 Reference Center for SARS-CoV-2 infection (Pasteur Institute, Paris,  
243 France)<sup>13</sup>. The RDT used in our study showed high sensitivity even more  
244 than 21 days after onset of symptoms, as well as a 100% specificity in a  
245 study carried out independently from the manufacturer<sup>14</sup>. Hence,  
246 seroprevalence rates from studies using ELISA tests must be cautiously  
247 interpreted as they may underestimate the real data.

248 In our study, 14% to 35% of workers were SARS-CoV-2 seropositive,  
249 despite having no symptoms or at least no severe disease. These data  
250 appear to be quite different than that observed in the rest of the world, but  
251 similar results have already been described in Ibadan, Nigeria, in healthcare  
252 workers who are much more exposed to the infection than mine workers<sup>9</sup>.  
253 A high level of seropositivity was found in both mining workers and  
254 administrative staff living in the economic capital. In mine A, as people live  
255 together, a cluster phenomenon may have occurred, explaining the  
256 difference in seroprevalence with mine B, which was more confined during  
257 the first wave with limited circulation between mine B and Abidjan.  
258 Subjects living in mine B had the same life habits as the African population  
259 living in Abidjan. Therefore, we can expect that this similar seroprevalence  
260 reflects the real one in Abidjan.

261 In mine B, subcontractors' workers constitute 67% of the working  
262 population compared to 29% in mine A. As subcontractors' worker do not  
263 live full-time in the mine, the lower seroprevalence of this population, could  
264 reflect a lower prevalence in rural areas of the country.

265 In the capital, seropositivity was 34.7% among the 121 subjects working in  
266 the administrative staff in Abidjan and having no contact with gold mines.  
267 This data could reflect the high SARS-CoV-2 seroprevalence in the general  
268 population living in Abidjan.

269 Nevertheless, the most surprising results of the current study are the  
270 extremely low percentage of symptomatic cases and mortality rate. Some  
271 authors speculate that African SARS-CoV-2 seroprevalence data could be  
272 related to a younger population, a favorable climate and possible  
273 preexisting immunity due to previous exposure to other coronaviruses <sup>14</sup>.

274 In our study, mean age was 37 years old and there was no increase in  
275 symptoms incidence or hospitalization according to age range. Our  
276 prevalence rates do not support hypothesis of a previous cross-reacting  
277 immunity due to other coronaviruses.

278 Relatively stable prevalence rates observed between July and September  
279 may indicate that SARS-CoV-2 outbreak occurred as early as March or April  
280 as in Europe, mainly not to say exclusively from imported cases, and spread  
281 silently but rapidly across the country. The plateau observed since July

282 could be related either to complete travel restrictions, to the end of the first  
283 epidemic wave as in Europe, to the nationwide control of the SARS-CoV-2  
284 circulation, or may reflect other phenomena including pre-existing  
285 immunity, genetic factors ... in the remaining population.

286

287 This study has some limitations. Firstly, the included population is not  
288 representative of the general Ivoirian population, although subjects living  
289 in Abidjan have similar habits to those of the Abidjan's population.  
290 Furthermore, the voluntary test may have selected people thinking to be  
291 more exposed to the virus, for example people who previously had mild  
292 symptoms or had households contacts of a confirmed SARS-CoV-2 case.  
293 Third, even if COVID-PRESTO® has an excellent diagnostic performance,  
294 diagnostic sensitivity decreases a few months after the infection, compared  
295 to the reference test S-Flow, and may therefore have underestimated the  
296 real seroprevalence.

297

298 In conclusion, the high SARS-CoV-2 prevalence rate among mining workers  
299 recruited for this study confirms a higher proportion of asymptomatic cases  
300 than that observed in Europe, South America or United States of America  
301 till now. Herd immunity could be achieved in Africa much easier than  
302 expected without generating a dramatic health crisis.

303

304 \*: Corresponding author: Thierry Prazuck, Service des maladies infectieuses  
305 et tropicales, Centre Hospitalier Regional d'Orleans, 14 avenue de l'hospital,  
306 45067 Orleans, Cedex 2, France . [thierry.prazuck@chr-orleans.fr](mailto:thierry.prazuck@chr-orleans.fr), phone:  
307 00(33) 238229593

308

309

310 References:

- 311 1. WHO Coronavirus Disease (COVID-19) Dashboard [Internet]. [cité 17  
312 déc 2020]. Disponible sur: <https://covid19.who.int/table>
- 313 2. COVID-19 Situation update for the WHO African Region, External  
314 Situation Report 34 (21 October 2020) - South Africa [Internet].  
315 ReliefWeb. [cité 17 déc 2020]. Available at:  
316 [https://apps.who.int/iris/bitstream/handle/10665/336181/SITREP\\_C](https://apps.who.int/iris/bitstream/handle/10665/336181/SITREP_COVID-19_WHOAFRO_20201021-eng.pdf)  
317 [OVID-19\\_WHOAFRO\\_20201021-eng.pdf](https://apps.who.int/iris/bitstream/handle/10665/336181/SITREP_COVID-19_WHOAFRO_20201021-eng.pdf)
- 318 3. Payne C. COVID-19 in Africa. *Nat Hum Behav.* mai 2020;4(5):436-7.
- 319 4. Myers J. MAVERICK CITIZEN OP-ED: Covid-19: After a severe epidemic,  
320 South Africa appears to be approaching some herd immunity [Internet].  
321 Daily Maverick. 2020 [cité 17 déc 2020]. Disponible sur:

322 <https://www.dailymaverick.co.za/article/2020-10-07-covid-19-after->  
323 [a-severe-epidemic-south-africa-appears-to-be-approaching-some-](https://www.dailymaverick.co.za/article/2020-10-07-covid-19-after-)  
324 [herd-immunity/](https://www.dailymaverick.co.za/article/2020-10-07-covid-19-after-)

325 5. Prazuck T, Colin M, Giachè S, Gubavu C, Seve A, Rzepecki V, et al.  
326 Evaluation of performance of two SARS-CoV-2 Rapid IgM-IgG combined  
327 antibody tests on capillary whole blood samples from the fingertip.  
328 PLoS One. 2020;15(9):e0237694.

329 6. Halatoko WA, Konu YR, Gbeasor-Komlanvi FA, Sadio AJ, Tchankoni MK,  
330 Komlanvi KS, et al. Prevalence of SARS-CoV-2 among high-risk  
331 populations in Lomé (Togo) in 2020. PLoS One. 2020;15(11):e0242124.

332 7. Uyoga S, Adetifa IMO, Karanja HK, Nyagwange J, Tuju J, Wanjiku P, et al.  
333 Seroprevalence of anti-SARS-CoV-2 IgG antibodies in Kenyan blood  
334 donors. medRxiv. 29 juill 2020;2020.07.27.20162693.

335 8. Asuquo MI, Effa E, Otu A, Ita O, Udoh U, Umoh V, et al. Prevalence of IgG  
336 and IgM antibodies to SARS-CoV-2 among clinic staff and patients.  
337 medRxiv. 24 juill 2020;2020.07.02.20145441.

338 9. Olayanju O, Bamidele O, Edem F, Eseile B, Amoo A, Nwaokenye J, et al.  
339 SARS-CoV-2 Seropositivity in Asymptomatic Frontline Health Workers  
340 in Ibadan, Nigeria. Am J Trop Med Hyg. 11 nov 2020;

- 341 10. Majiya H, Aliyu-Paiko M, Balogu VT, Musa DA, Salihu IM, Kawu AA, et al.  
342 Seroprevalence of COVID-19 in Niger State. medRxiv. 5 août  
343 2020;2020.08.04.20168112.
- 344 11. Kempen JH, Abashawl A, Suga HK, Nigussie Difabachew M, Kempen CJ,  
345 Tesfaye Debele M, et al. SARS-CoV-2 Serosurvey in Addis Ababa,  
346 Ethiopia. Am J Trop Med Hyg. nov 2020;103(5):2022-3.
- 347 12. Chibwana MG, Jere KC, Kamng'ona R, Mandolo J, Katunga-Phiri V,  
348 Tembo D, et al. High SARS-CoV-2 seroprevalence in Health Care  
349 Workers but relatively low numbers of deaths in urban Malawi.  
350 medRxiv. 1 août 2020;
- 351 13. Grzelak L, Velay A, Madec Y, Gallais F, Staropoli I, Schmidt-Mutter C, et  
352 al. Sex differences in the decline of neutralizing antibodies to SARS-  
353 CoV-2. medRxiv. 15 nov 2020;2020.11.12.20230466.
- 354 14. Njenga MK, Dawa J, Nanyingi M, Gachohi J, Ngere I, Letko M, et al. Why  
355 is There Low Morbidity and Mortality of COVID-19 in Africa? Am J Trop  
356 Med Hyg. août 2020;103(2):564-9.

357  
358  
359  
360  
361



362  
363  
364  
365  
366  
367  
368  
369  
370  
371  
372  
373

| Characteristics          | Overall  | Ity      | Agbaou   | Abidjan  | p       |
|--------------------------|----------|----------|----------|----------|---------|
| N                        | 1687     | 803      | 763      | 121      |         |
| Sex ratio (M/F)          | 10.2     | 14.1     | 10.1     | 3.17     | < 0.001 |
| <b>Age</b><br>Mean (SD)  | 38 (8.6) | 36 (8.3) | 37 (8.7) | 39 (9.7) | 0.001   |
| • <36                    | 805      | 400      | 359      | 46       | NS      |
| • 36-49                  | 733      | 338      | 336      | 59       |         |
| • >=50                   | 149      | 65       | 68       | 16       |         |
| <b>Employee's status</b> |          |          |          |          | <0.001  |
| • Direct employees       | 848      | 587      | 258      | 3        |         |
| • Subcontractors         | 721      | 213      | 505      | 3        |         |
| • Administrative staff   | 118      | 3        |          | 115      |         |

374  
375  
376  
377  
378  
379

Table I: Sociodemographic characteristics of the study population

|               |      | Univariate             |                  |    | Multivariate         |    |
|---------------|------|------------------------|------------------|----|----------------------|----|
|               | N    | Prevalence<br>[95% CI] | OR               | P  | aOR<br>(95% CI)      | P  |
| <b>Gender</b> |      |                        |                  |    |                      |    |
| Female        | 151  | 25,2% [18,2%-32,1%]    | 1,01 [0,94-1,09] | NS | 0,88 [0,58-1,3]<br>1 | NS |
| Male          | 1536 | 25% [22,8%-27,2%]      | 0,99 [0,92-1,07] |    |                      |    |

|                   |                      |            |                                            |                                    |                |                      |           |
|-------------------|----------------------|------------|--------------------------------------------|------------------------------------|----------------|----------------------|-----------|
| Age               | ≤35                  | 805        | 24,8% [21,9%-27,8%]                        | 0,98 [0,96-1,01]                   | NS             | 1                    | NS        |
|                   | 36-49                | 733        | 25,2% [22,1%-28,4%]                        | 1,02 [1-1,05]                      |                | 1,04[0,82-1,33]      |           |
|                   | ≥50                  | 149        | 24,8% [17,9%-31,8%]                        | 0,99 [0,92-1,07]                   |                | 1,18[0,75-1,82]      |           |
| Employees status  | Direct employees     |            |                                            |                                    | < 0.001<br>*** |                      | 0.001**   |
|                   | Subcontractors       | 848        | 33,3% [30,1%-36,4%]                        | 2,49 [2,4-2,56]                    |                | 2,33 [1,8-3,1]       |           |
|                   | Administrative staff | 721<br>118 | 13,7% [11,2%-16,2%]<br>34,7% [26,2%-43,3%] | 0,32 [0,3-0,33]<br>1,66 [1,53-1,8] |                | 1<br>1,58 [0,34-6,8] |           |
| Country of origin | Ivory Coast          |            |                                            |                                    | 0.001<br>**    |                      | 0.001*    |
|                   | African other        | 1458       | 26,5% [24,3%-28,8%]                        | 2 [1,86-2,15]                      |                | 3,5 [1,9-7]          |           |
|                   | Non-African          | 143<br>86  | 16,1% [10,1%-22,1%]<br>14% [6,6%-21,3%]    | 0,55 [0,5-0,6]<br>0,47 [0,4-0,57]  |                | 1,8 [0,9-4.2]<br>1   |           |
| Location          | Mine A               | 803        | 34,4% [31,1%-37,7%]                        | 2,65 [2,58-2,72]                   | < 0.001<br>*** | 2,54 [1,9-3,35]      | <0.001*** |
|                   | Mine B               | 763        | 13,6% [11,2%-16,1%]                        | 0,3 [0,3-0,3]                      |                | 1                    |           |
|                   | Abidjan              | 121        | 34,7% [26,2%-43,2%]                        | 1,66 [1,53-1,8]                    |                | 3,5 [0,8-16,4]       |           |

380  
381  
382  
383  
384  
385  
386  
387  
388  
389  
390

Table II: SarS-CoV2 seroprevalence rates, odds ratios and 95% confidence interval according to sociodemographic characteristics plus adjusted odds ratio (logistic model).
